# Supplementary material
Source: publisher figshare collection journal article supplement (https://frontiersin.figshare.com/ndownloader/files/32418254)
Supplement: Supplementary file [file 32418254]

|                    |                                   | InFEV1% | RV      | InRV/TLC | TLC (l) | TLC (%) | InBRSup (rest) | InBRSDown (rest) | InBRSmean (rest) |
|--------------------|-----------------------------------|---------|---------|----------|---------|---------|----------------|------------------|------------------|
| InBRSup (rest)     | Pearson's correlation coefficient | ,551**  | -,532** | -,587**  | -,268   | -,505** |                |                  |                  |
|                    | P value                           | ,000    | ,001    | ,000     | ,115    | ,002    |                |                  |                  |
| InBRSDown (rest)   | Pearson's correlation coefficient | ,390*   | -,304   | -,347*   | -,118   | -,127   |                |                  |                  |
|                    | P value                           | ,023    | ,085    | ,048     | ,514    | ,482    |                |                  |                  |
| InBRSmean (rest)   | Pearson's correlation coefficient | ,496**  | -,467** | -,496**  | -,214   | -,280   |                |                  |                  |
|                    | P value                           | ,002    | ,004    | ,002     | ,204    | ,093    |                |                  |                  |
| InBRSup (stress)   | Pearson's correlation coefficient | ,530**  | -,441** | -,464**  | -,224   | -,405*  |                |                  |                  |
|                    | P value                           | ,001    | ,007    | ,004     | ,190    | ,014    |                |                  |                  |
| InBRSDown (stress) | Pearson's correlation coefficient | ,493**  | -,454** | -,605**  | -,020   | -,453** |                |                  |                  |
|                    | P value                           | ,002    | ,006    | ,000     | ,908    | ,006    |                |                  |                  |
| InBRSmean (stress) | Pearson's correlation coefficient | ,541**  | -,520** | -,624**  | -,122   | -,520** |                |                  |                  |
|                    | P value                           | ,001    | ,001    | ,000     | ,477    | ,001    |                |                  |                  |
| SV                 | Pearson's correlation coefficient |         | -,435** | -,585**  | -,030   | -,573** | ,502**         | ,346*            | ,401*            |
|                    | P value                           |         | ,004    | ,000     | ,849    | ,000    | ,002           | ,045             | ,013             |
| SI                 | Pearson's correlation coefficient |         | -,440** | -,533**  | -,118   | -,403** |                |                  |                  |
|                    | P value                           |         | ,003    | ,000     | ,453    | ,007    |                |                  |                  |

**Table 1:** Correlations between baroreceptor reflex sensitivity, SV, SI and parameters of lung function. Legend: In: natural logarithm; BRSup: mean slope of sequences characterized by progressive increase in pulse interval and systolic blood pressure; BRSDown: mean slope of sequences characterized by progressive decrease in pulse interval and systolic blood pressure; BRSmean: mean of BRSup and BRSDown; SV: stroke volume; SI: stroke index; FEV<sub>1</sub>%; Forced expiratory volume in one second predicted; RV: Residual volume; TLC: Total lung capacity.
